# Supplementary material for: Dynamic changes in immune gene co-expression networks predict development of type 1 diabetes
Source: PubMed Central journal article supplement (PMC8609030; doi:10.1038/s41598-021-01840-z), 2021-11-22

**Supplementary Figure 1:** Dynamic changes in connectivity for all modules. Module Differential Connectivity (MDC) over time in intervals of 10 days. Solid points indicate a significant difference between cases and controls (FDR<0.05). MDC in females is shown in red, MDC in males is shown in blue.

# pink MDC over time (cases/ctr)

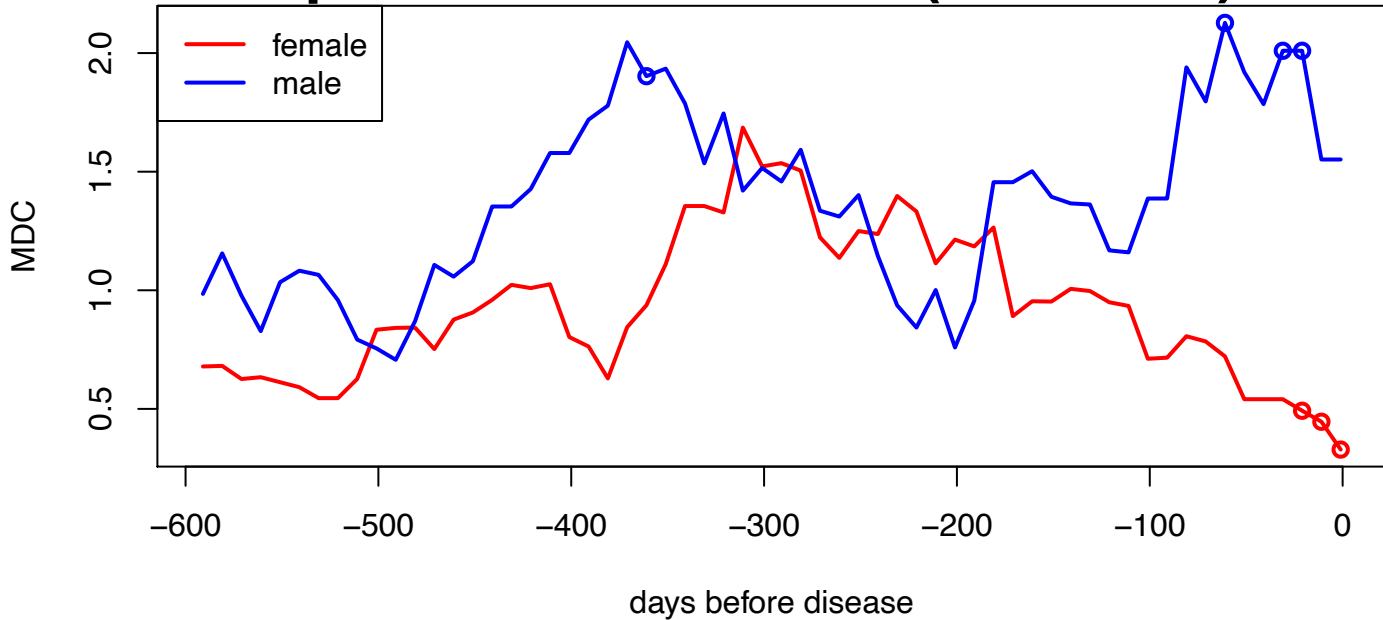

# red MDC over time (cases/ctr)

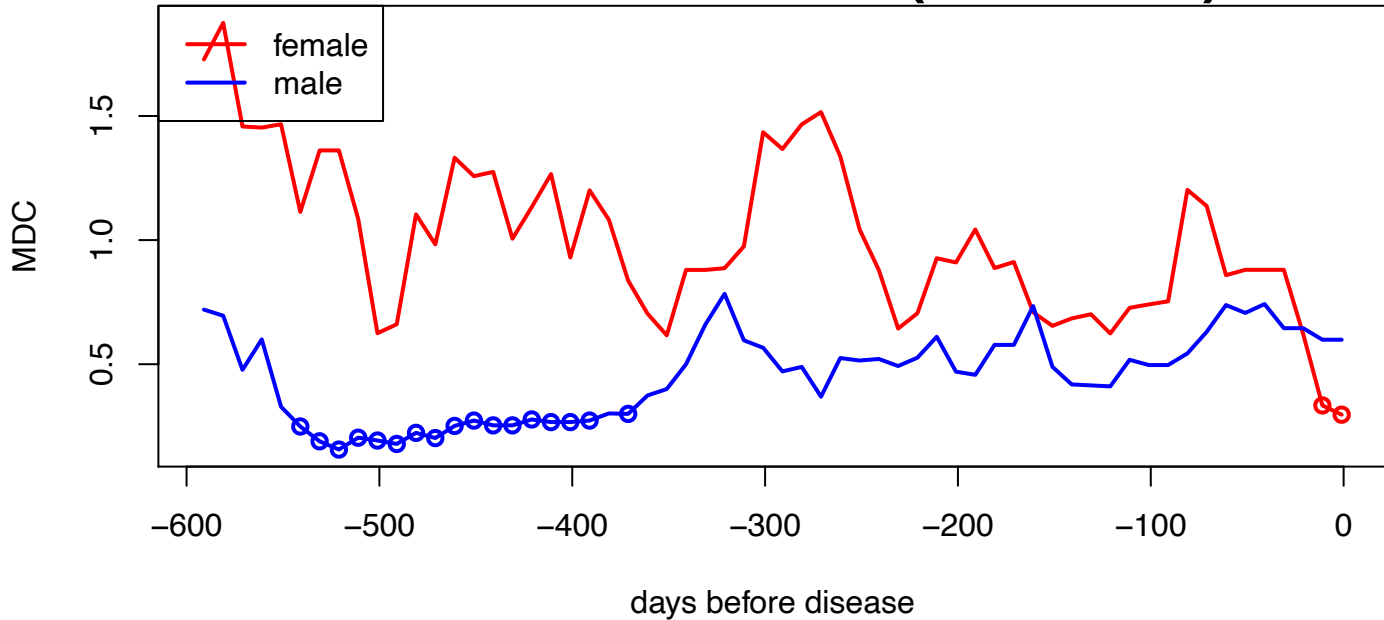

# yellow MDC over time (cases/ctr)

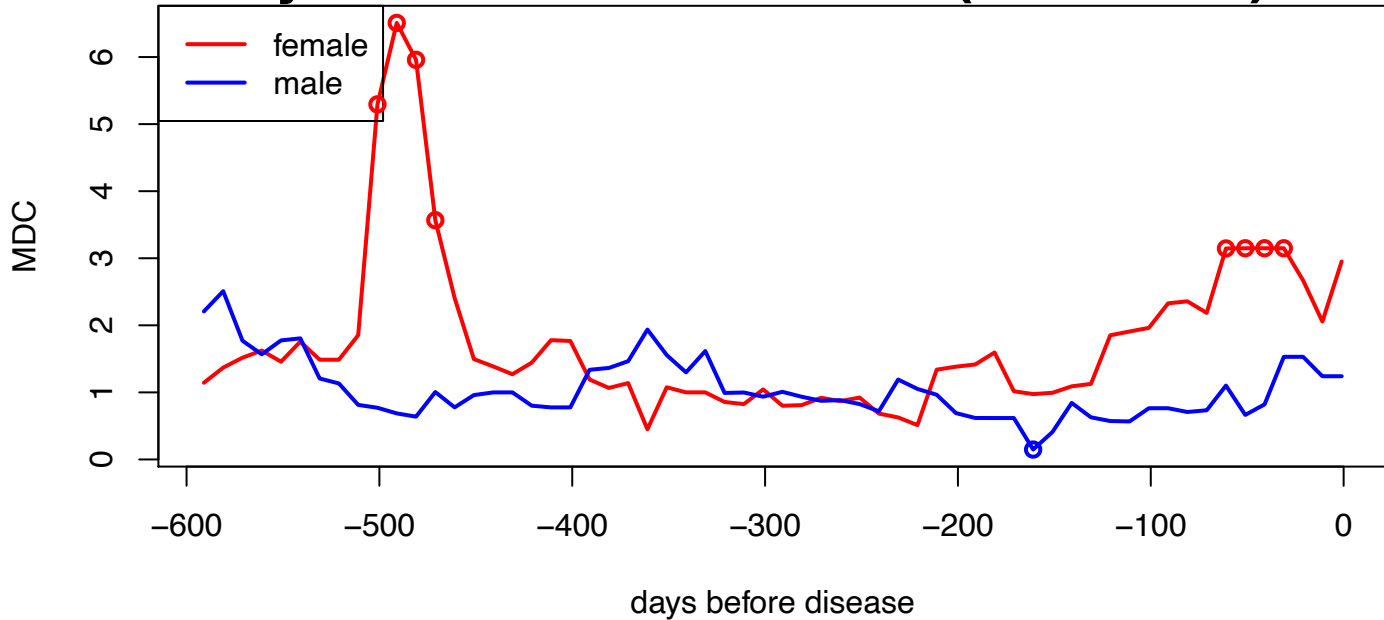

# green MDC over time (cases/ctr)

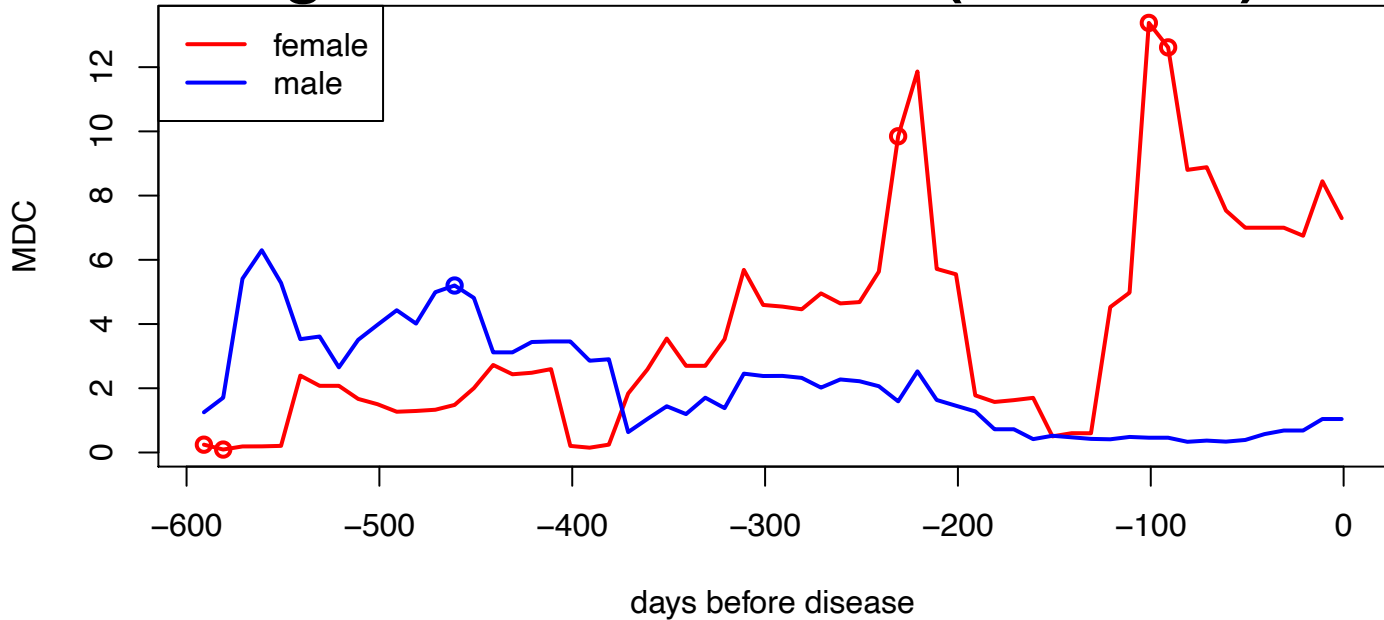

# greenyellow MDC over time (cases/ctr)

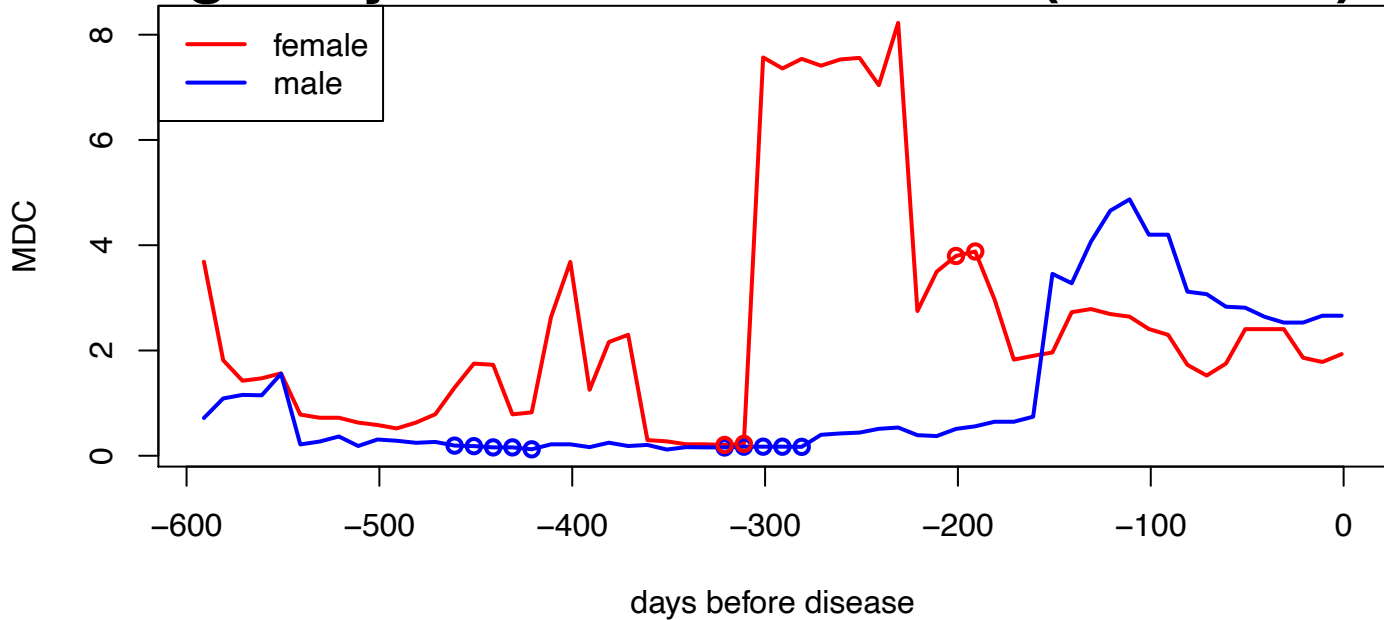

# cyan MDC over time (cases/ctr)

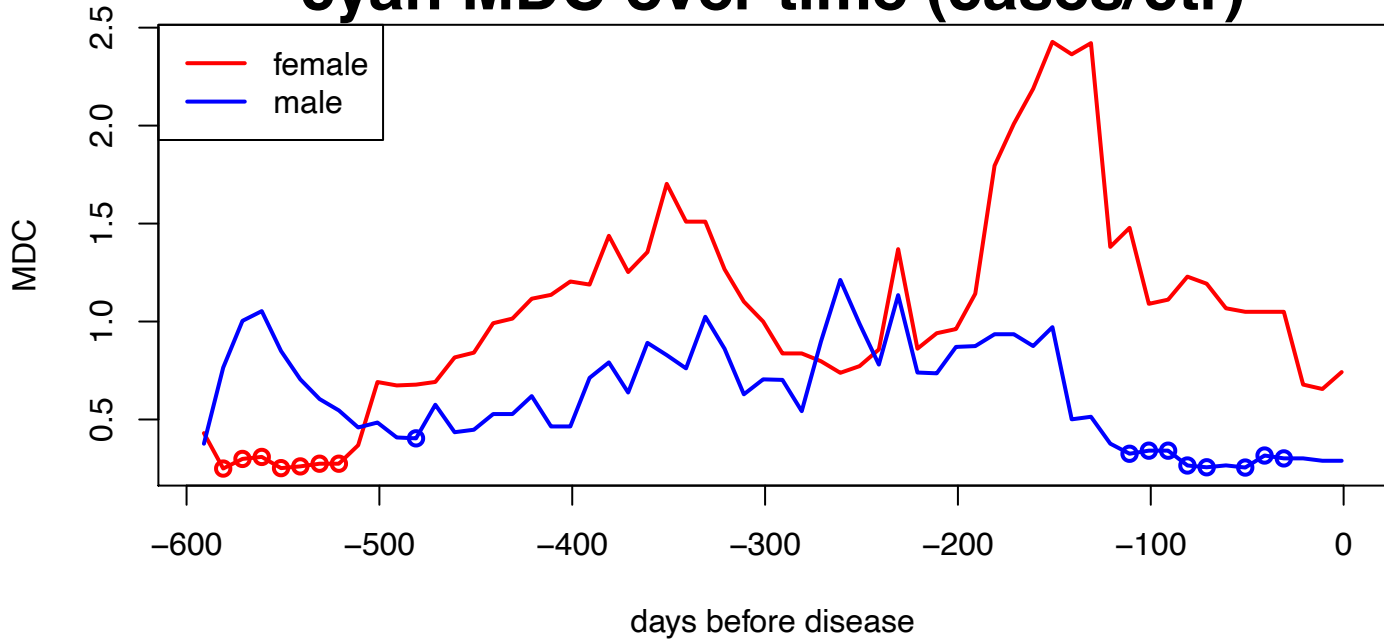

# magenta MDC over time (cases/ctr)

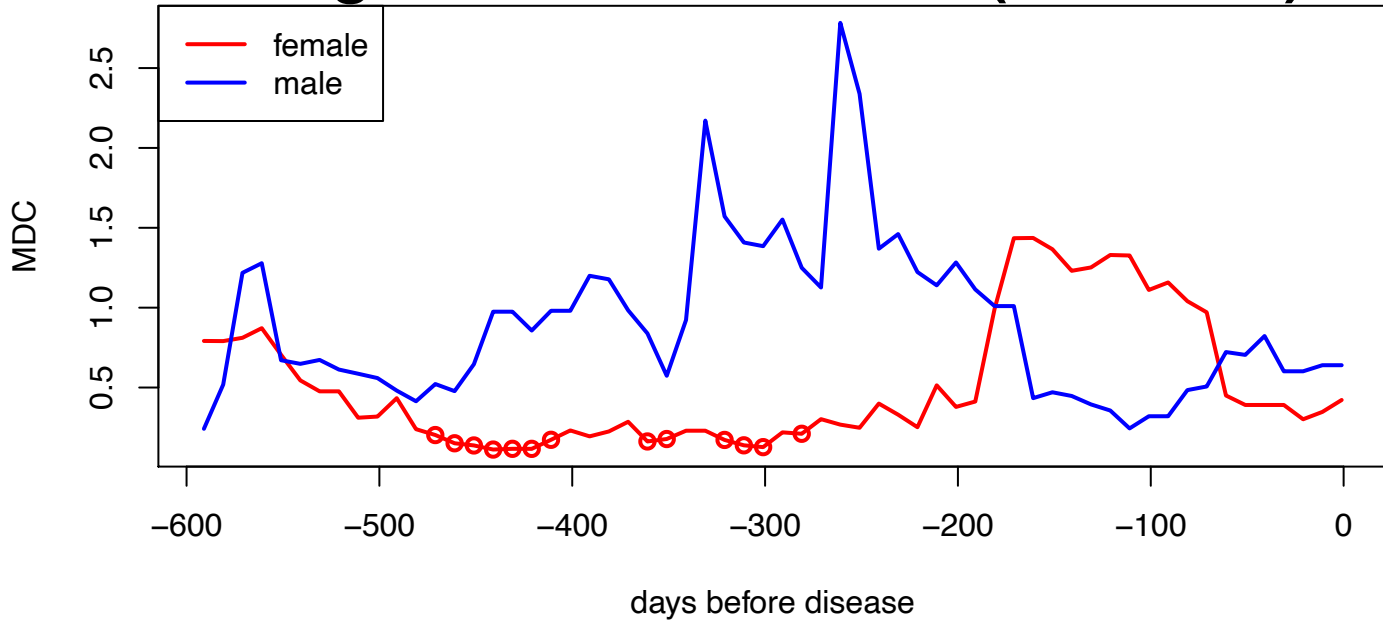



# brown MDC over time (cases/ctr)

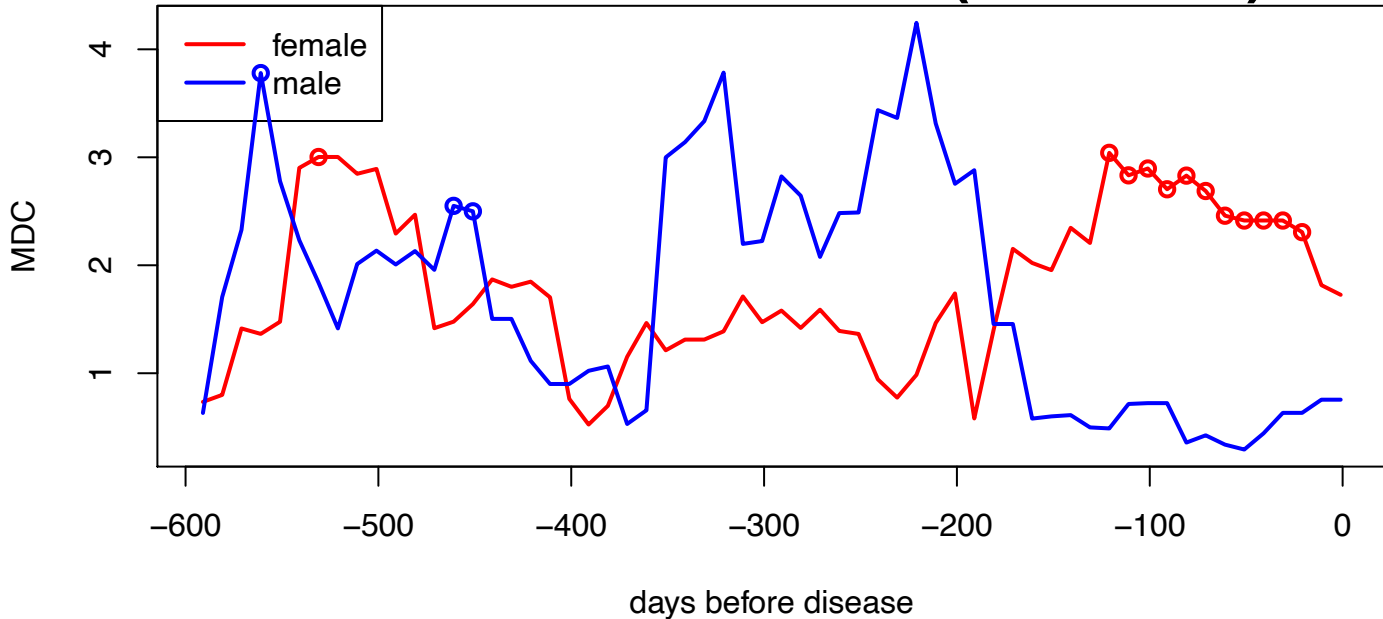

# turquoise MDC over time (cases/ctr)

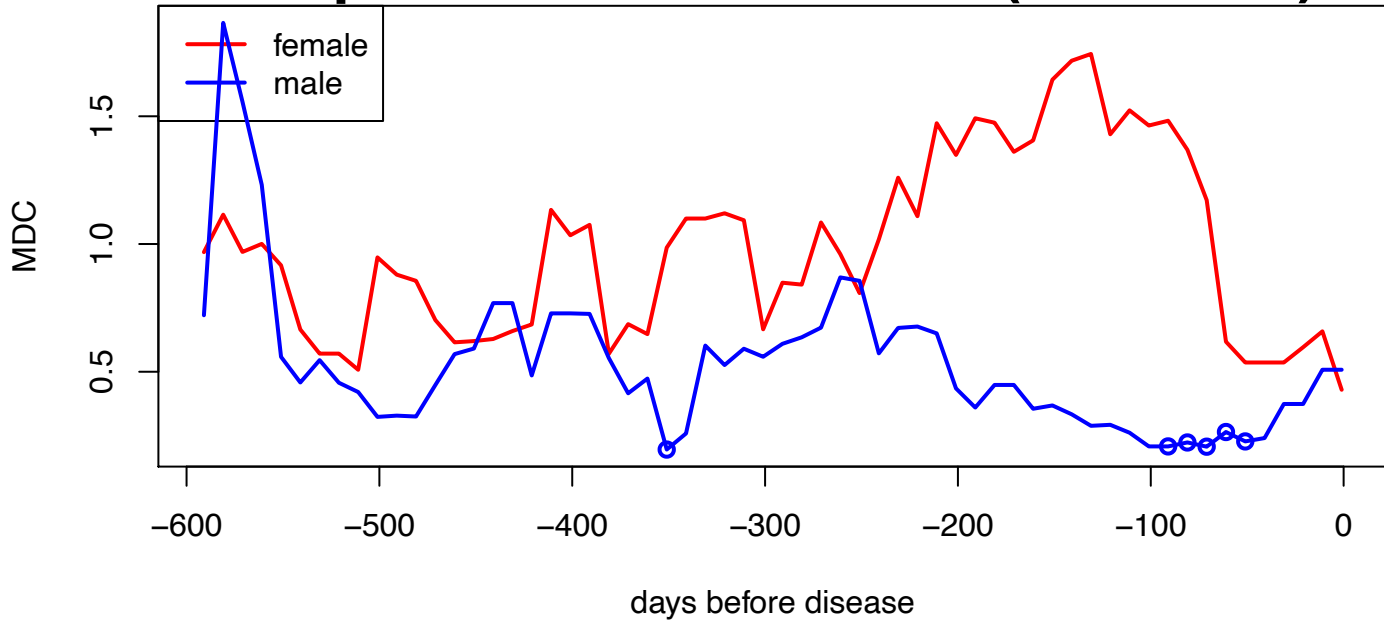

# black MDC over time (cases/ctr)

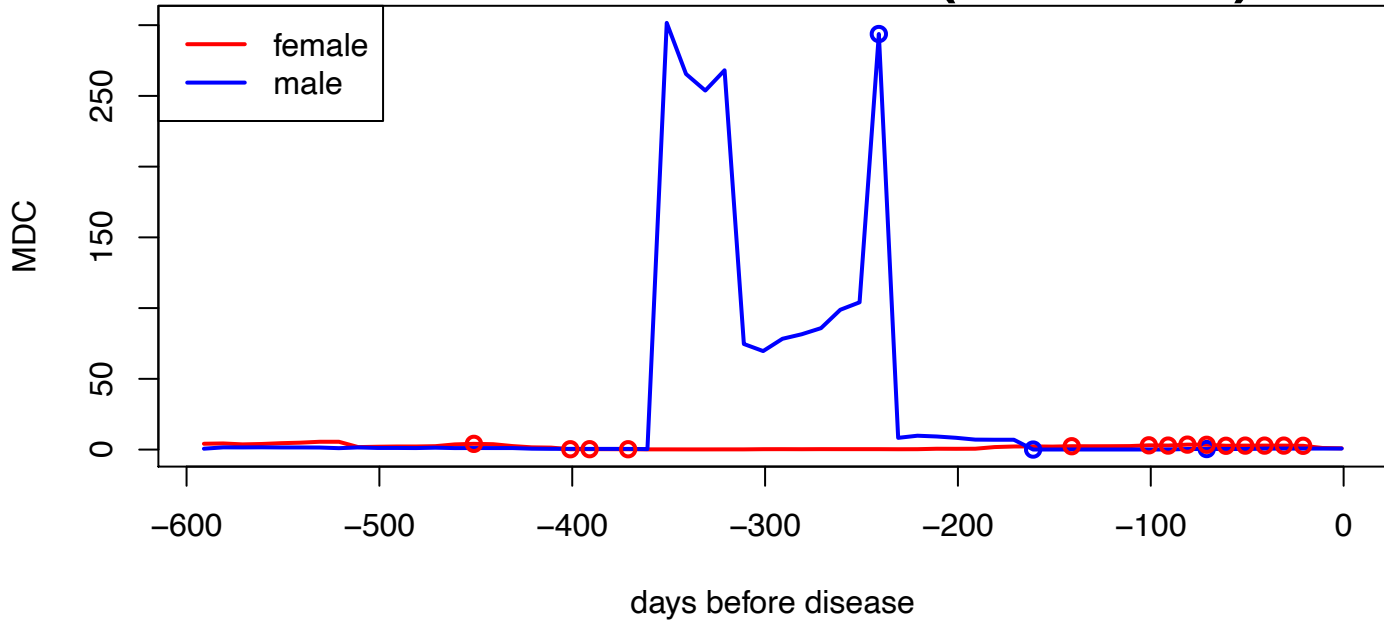

# blue MDC over time (cases/ctr)

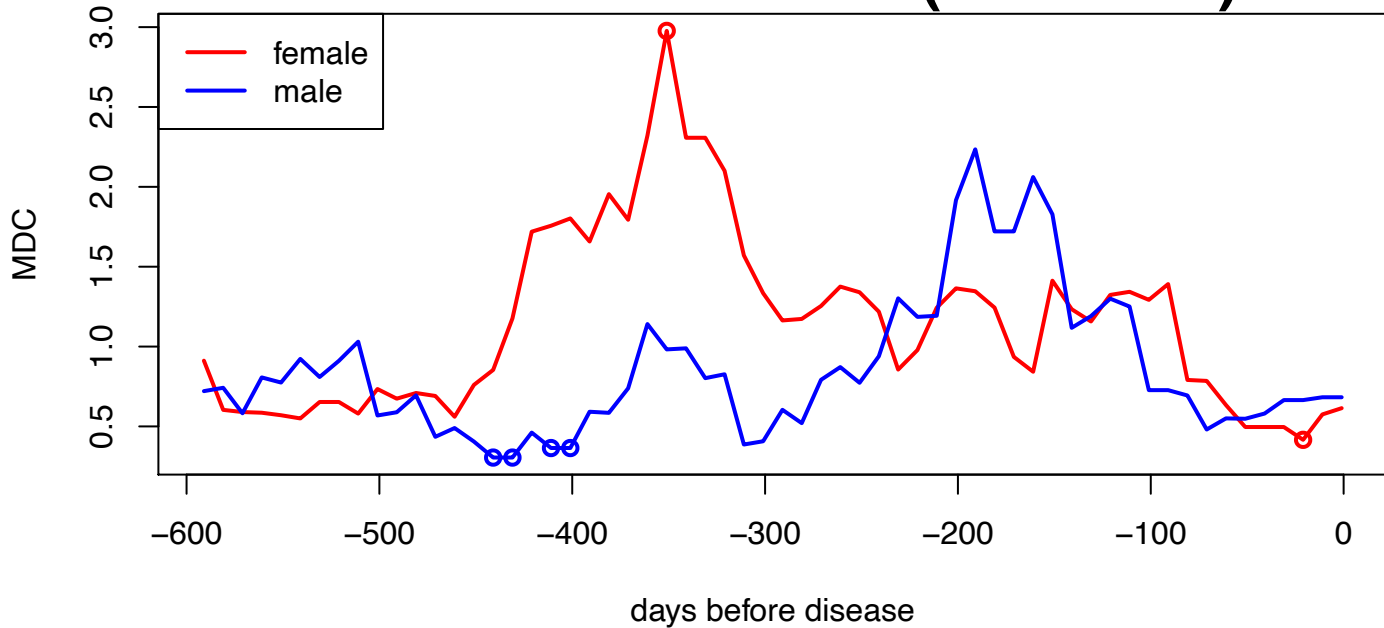

# purple MDC over time (cases/ctr)

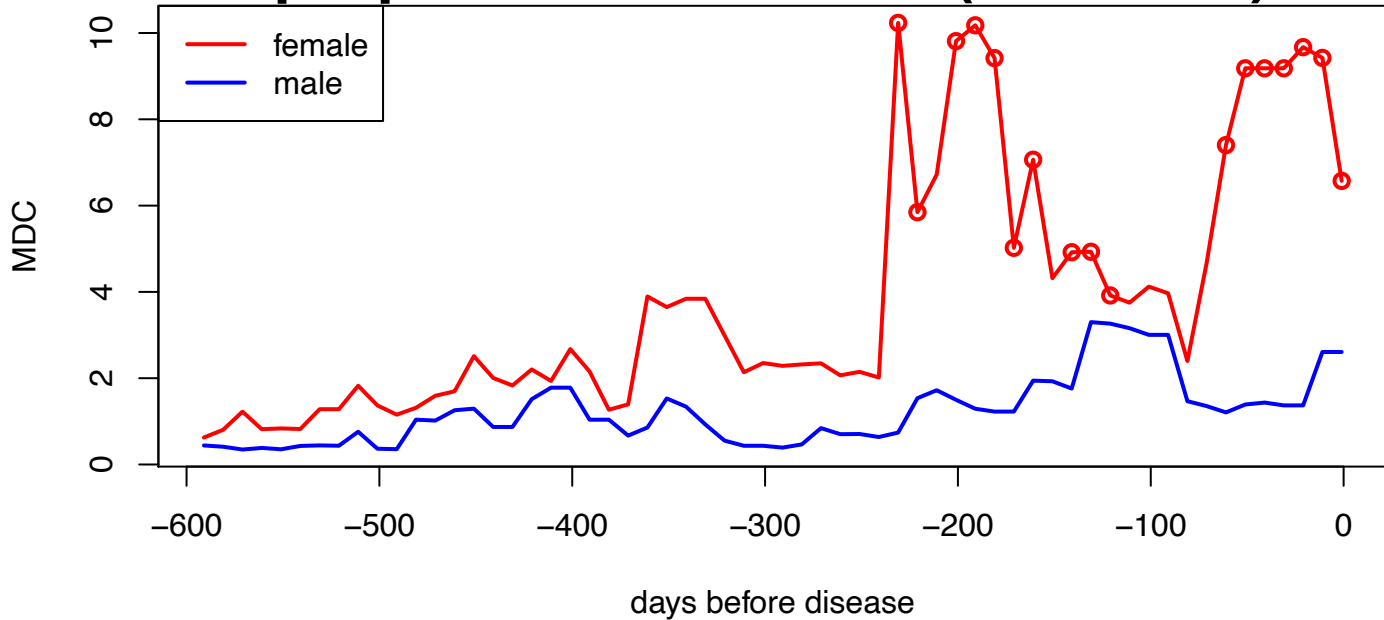

# darkturquoise MDC over time (cases/ctr)

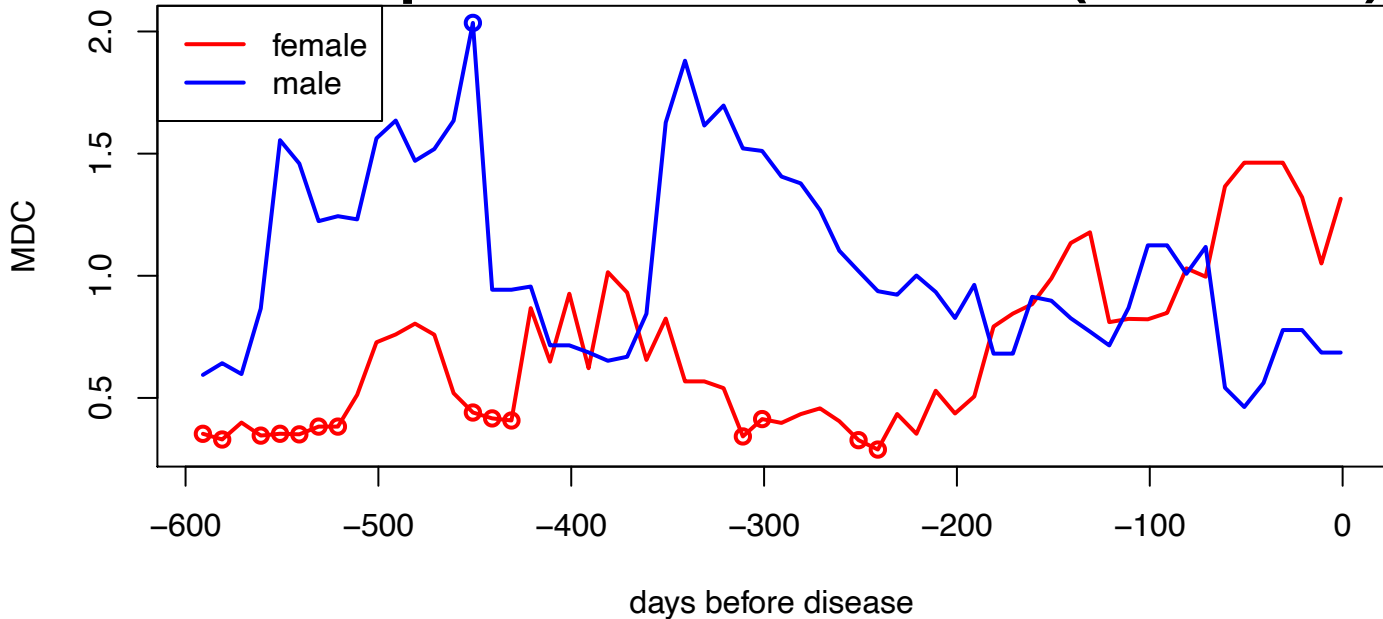

# midnightblue MDC over time (cases/ctr)

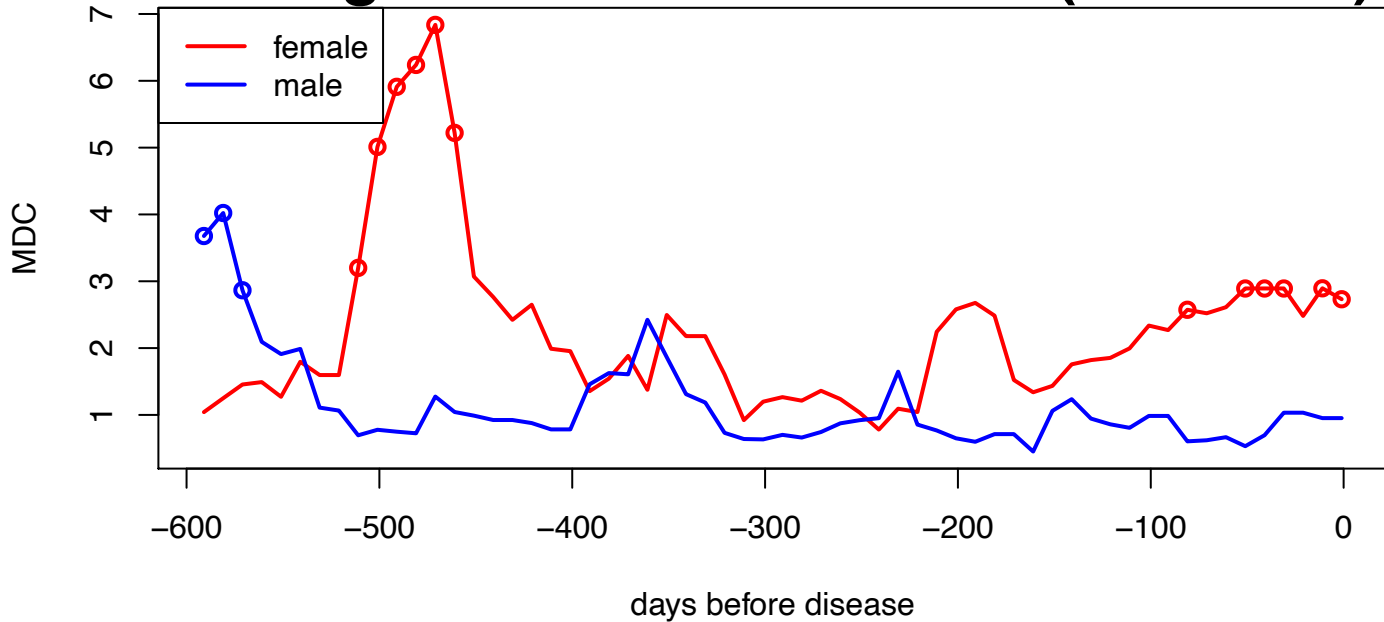

# darkred MDC over time (cases/ctr)

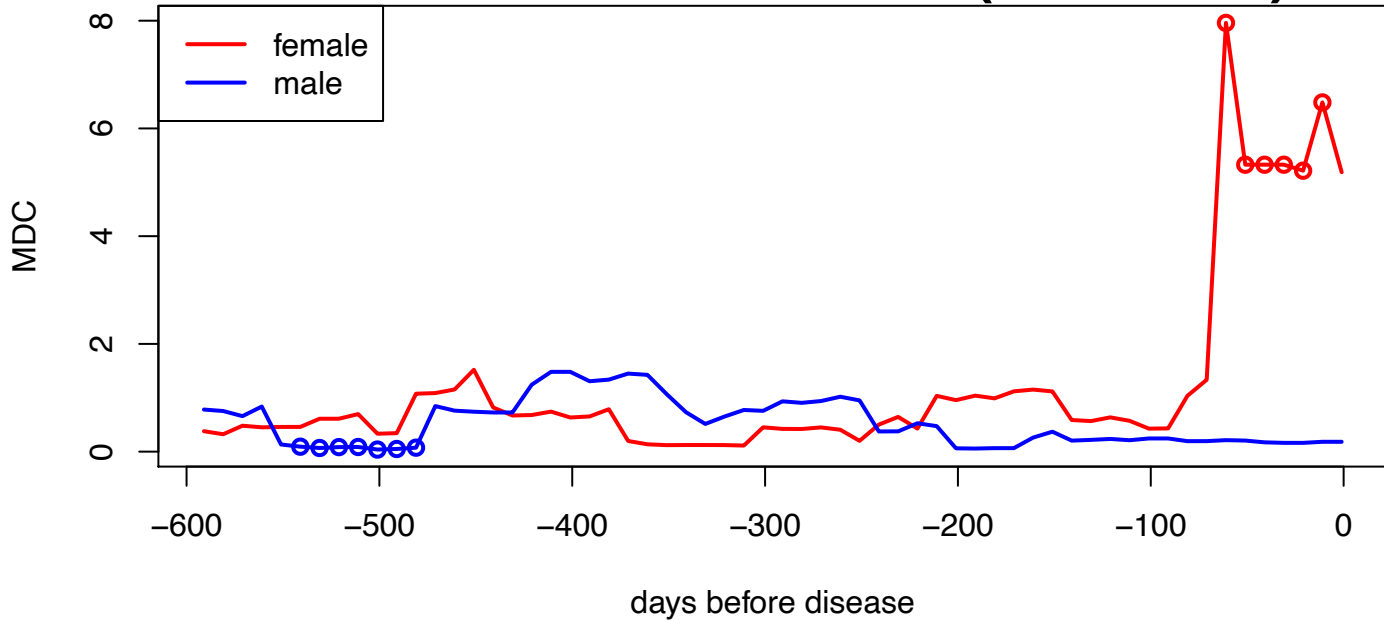



# lightyellow MDC over time (cases/ctr)

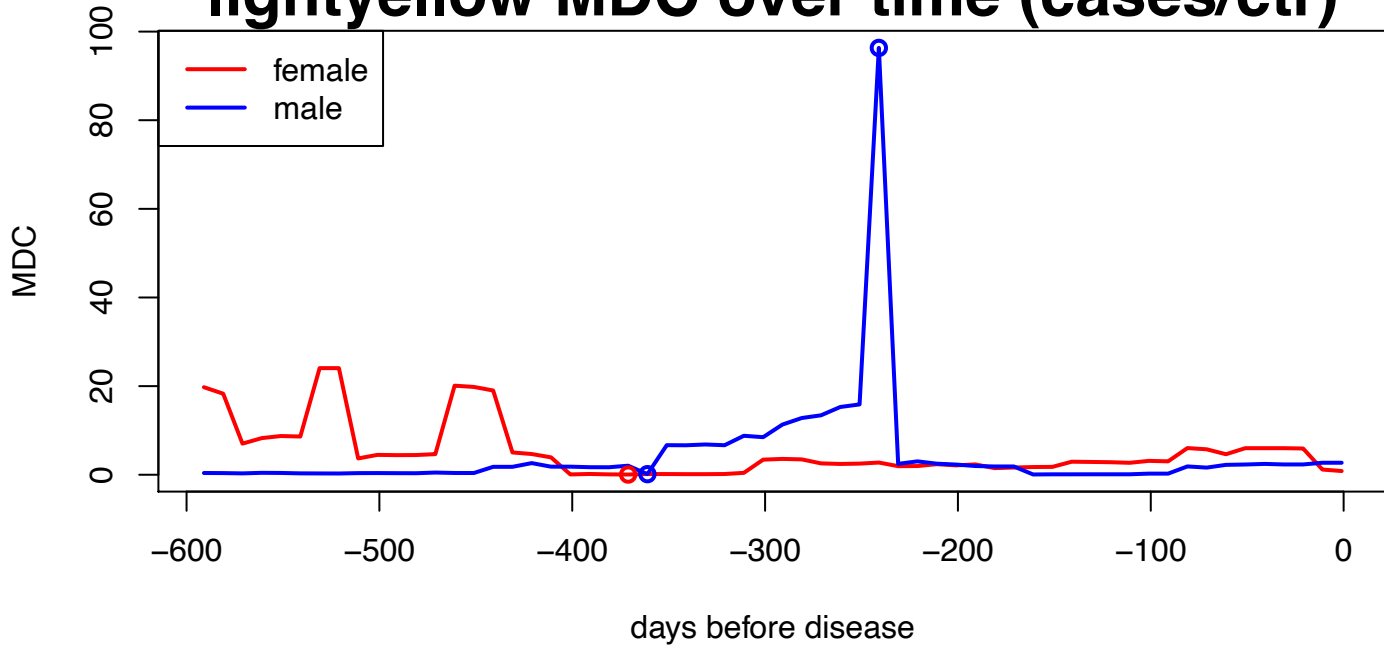

# salmon MDC over time (cases/ctr)

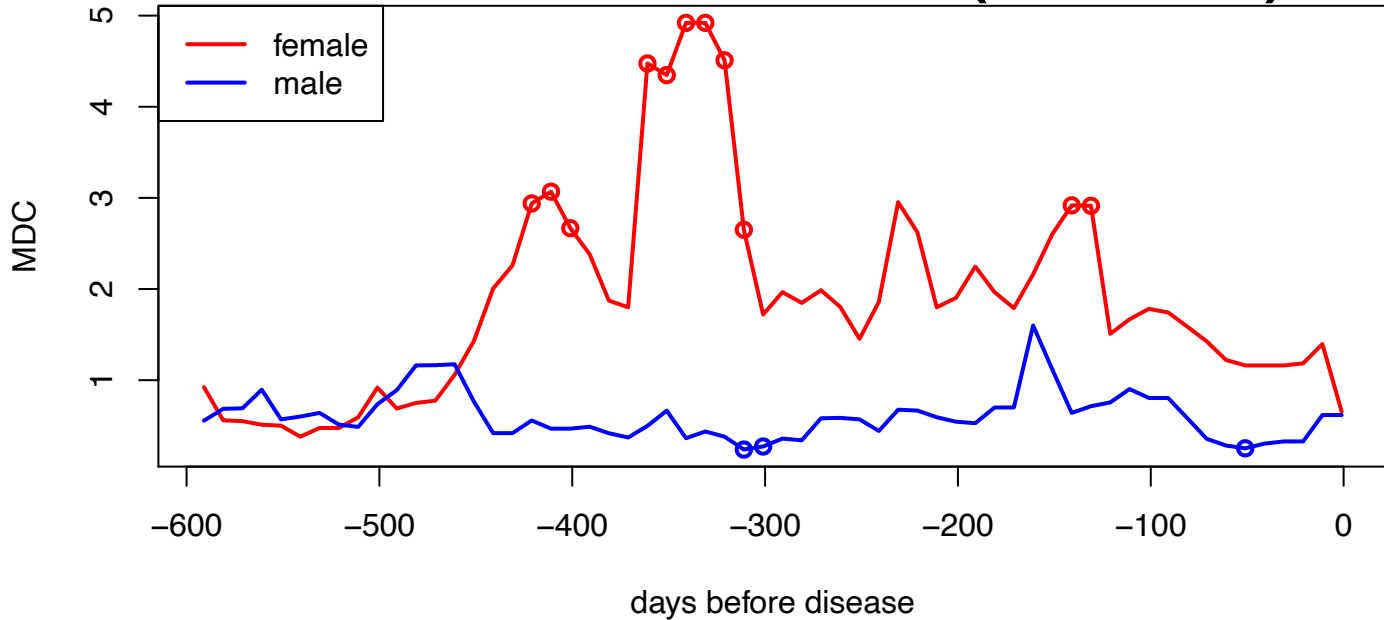

# saddlebrown MDC over time (cases/ctr)

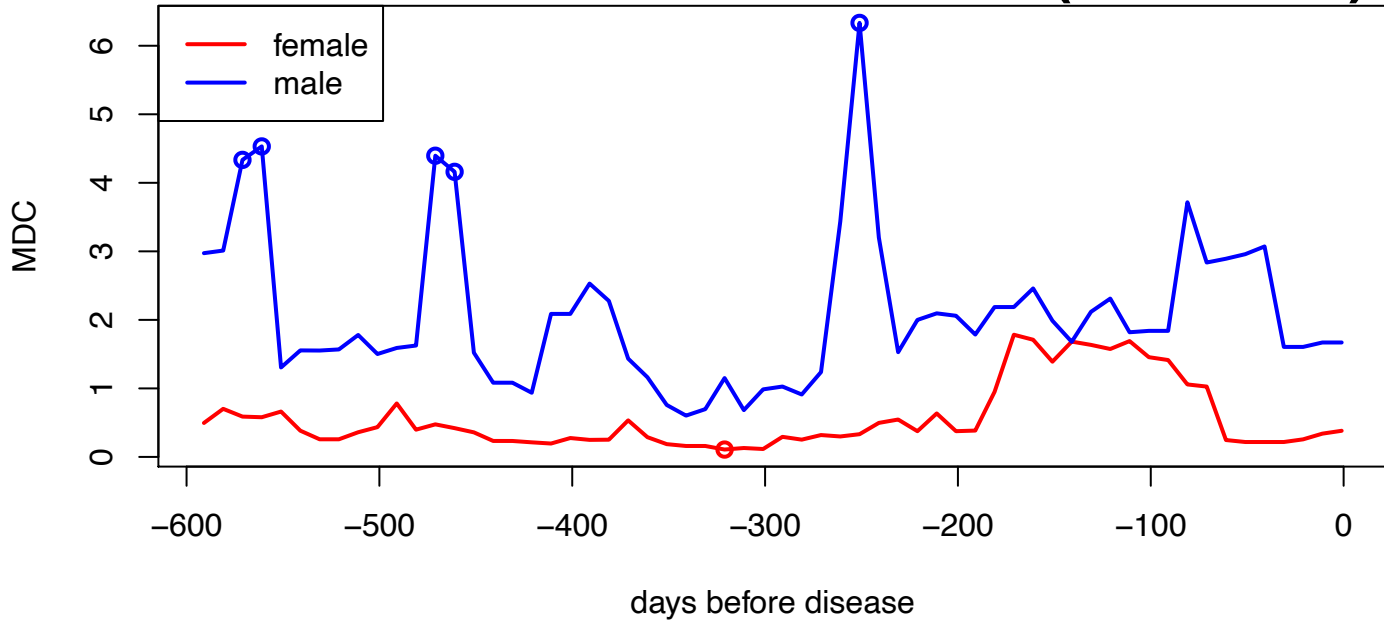

# darkgreen MDC over time (cases/ctr)

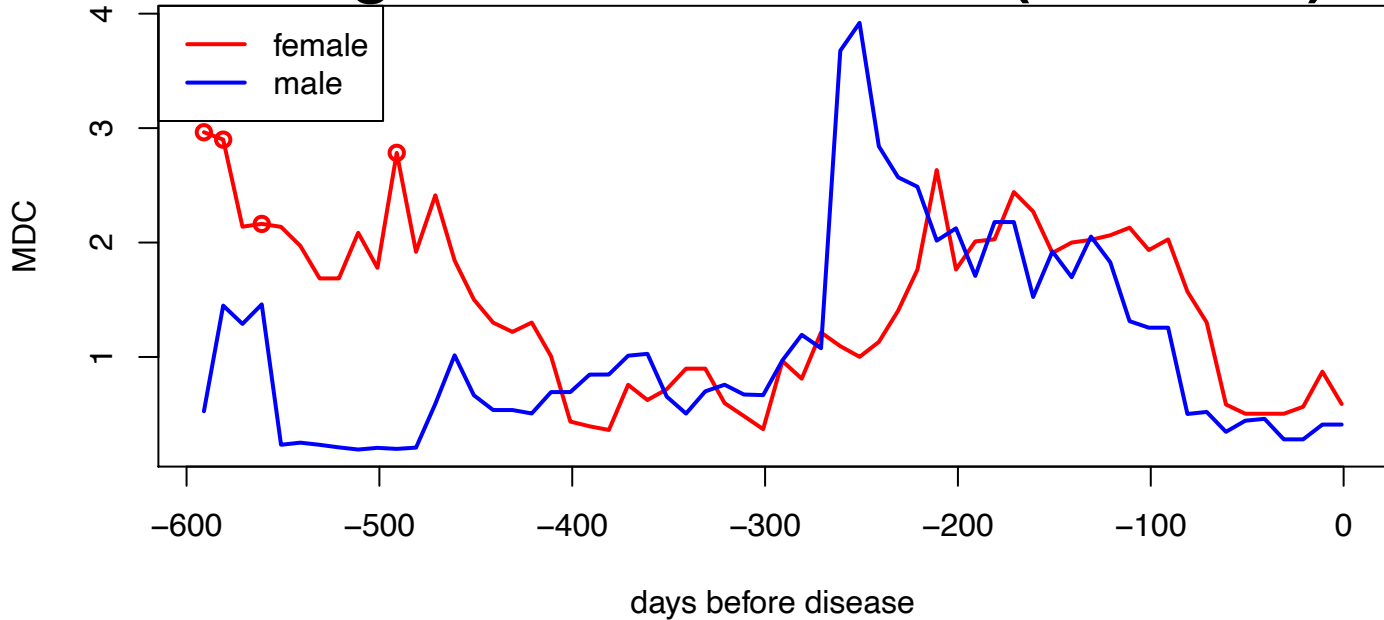

# lightcyan MDC over time (cases/ctr)

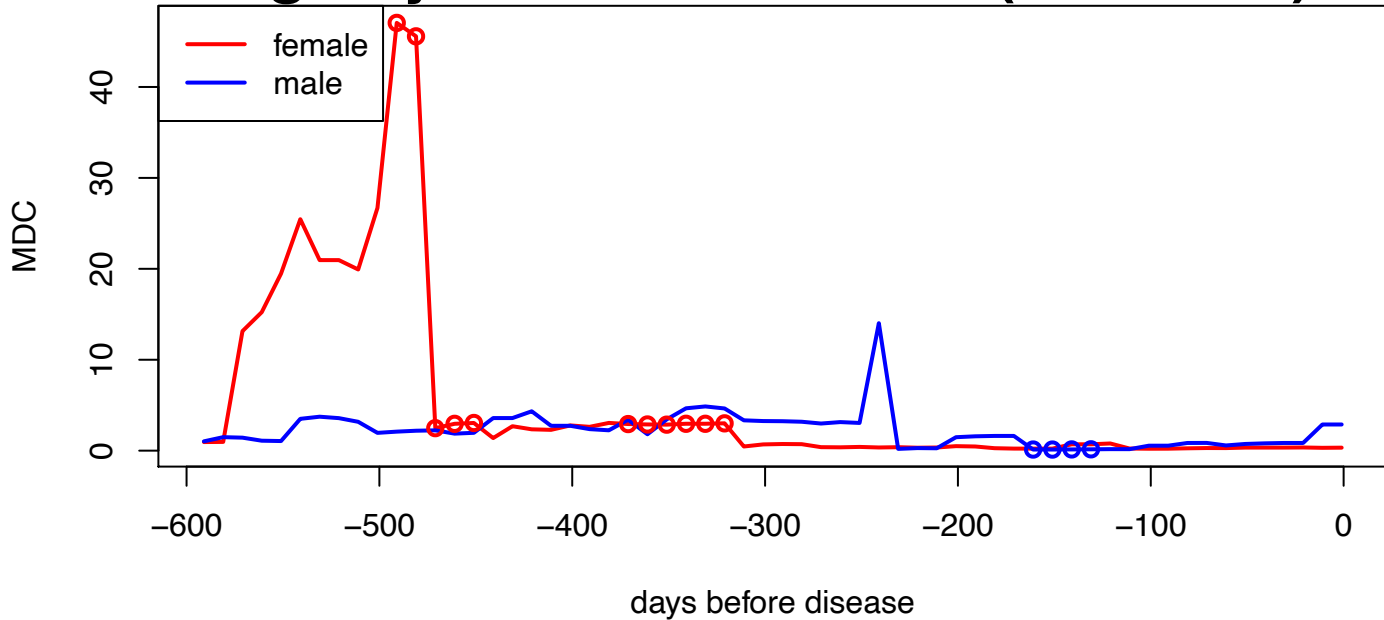

# lightgreen MDC over time (cases/ctr)

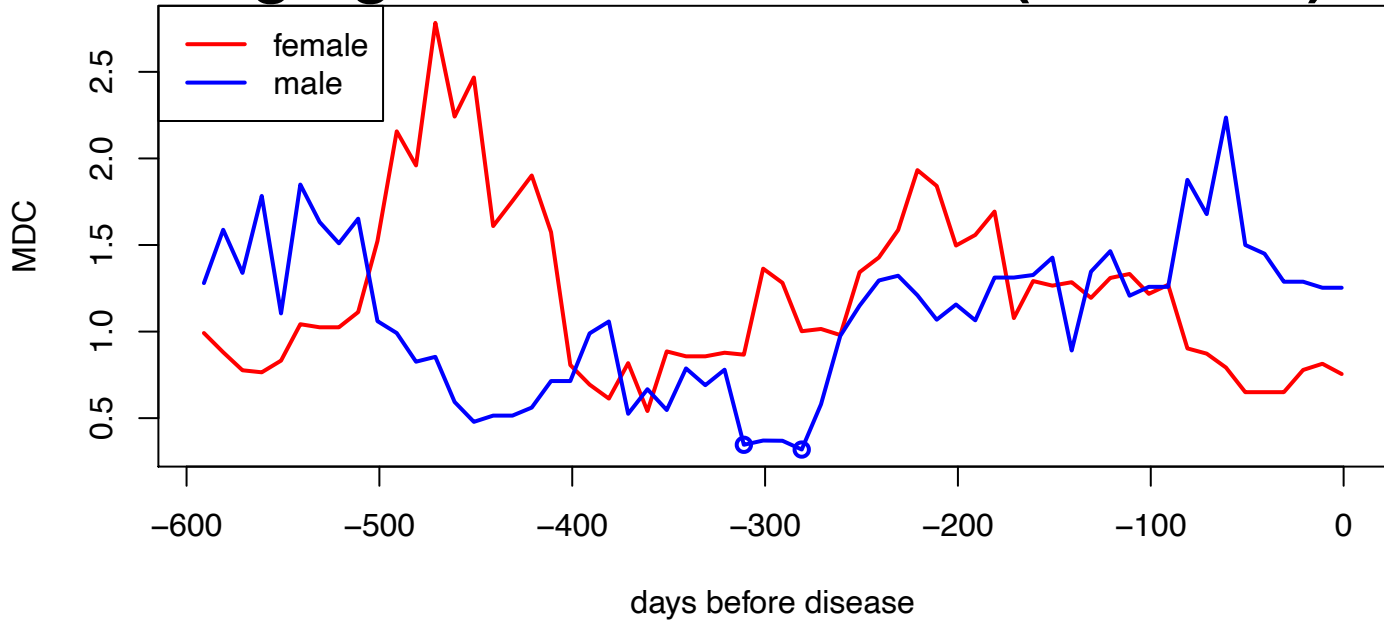

# grey60 MDC over time (cases/ctr)

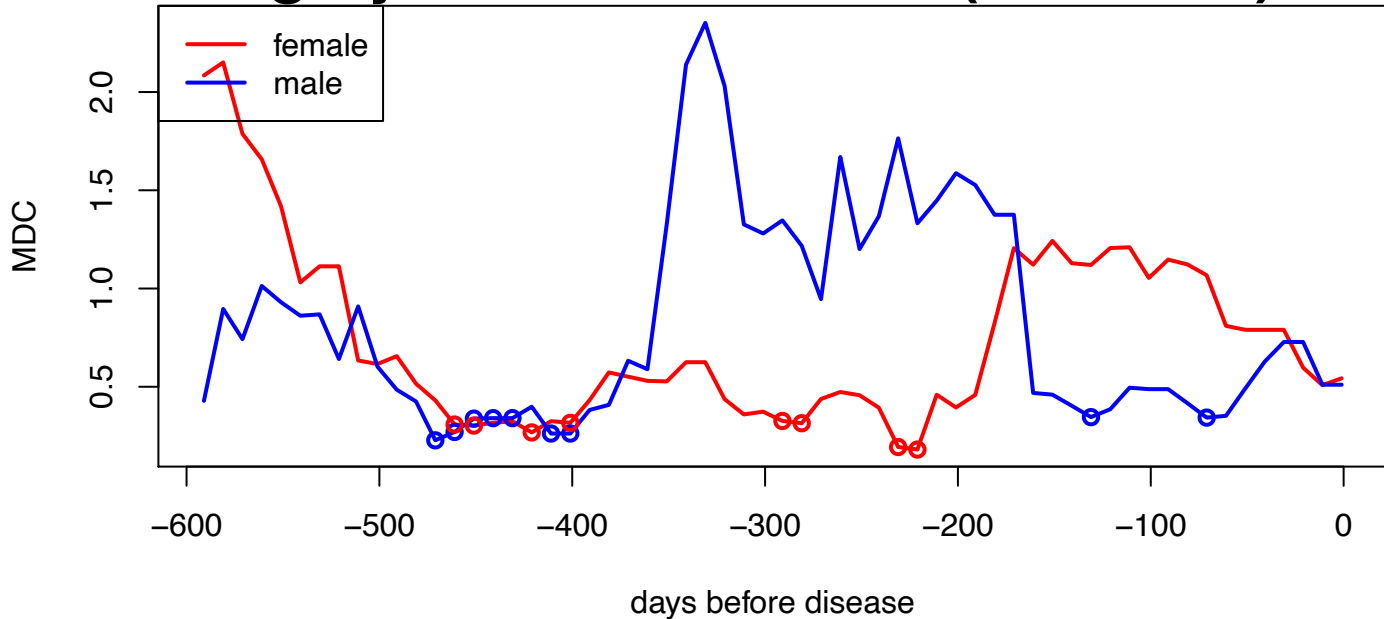

# darkgrey MDC over time (cases/ctr)

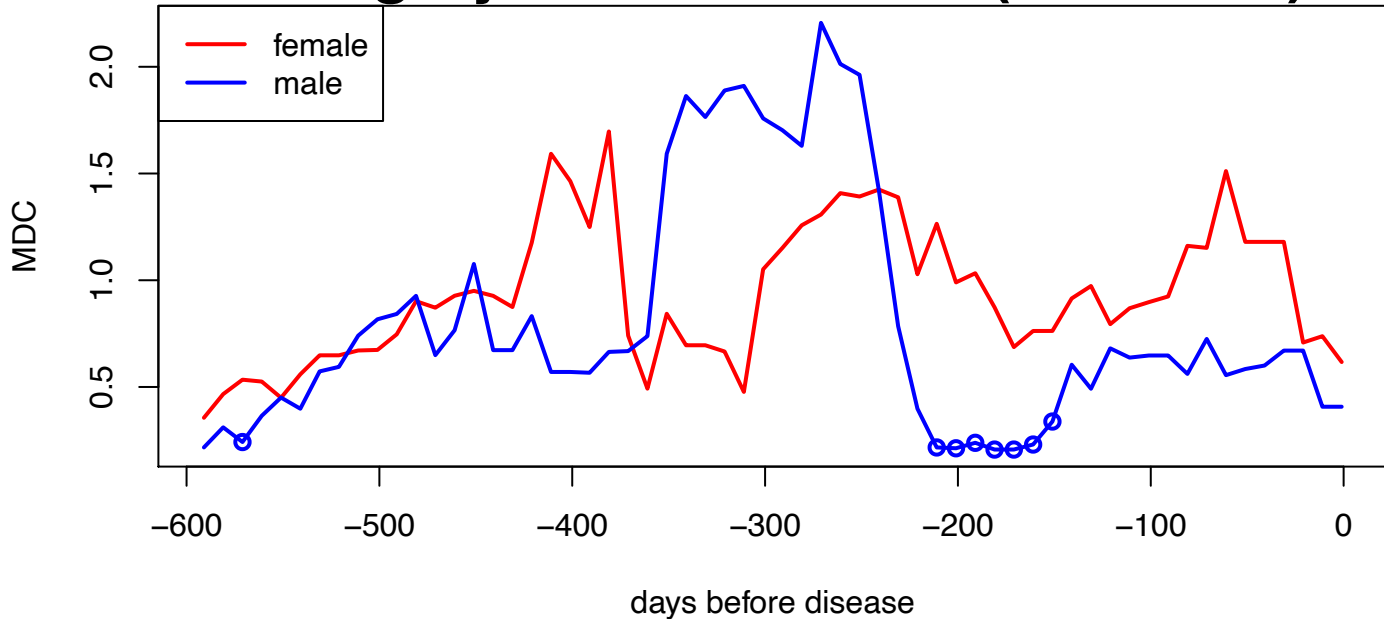



# tan MDC over time (cases/ctr)

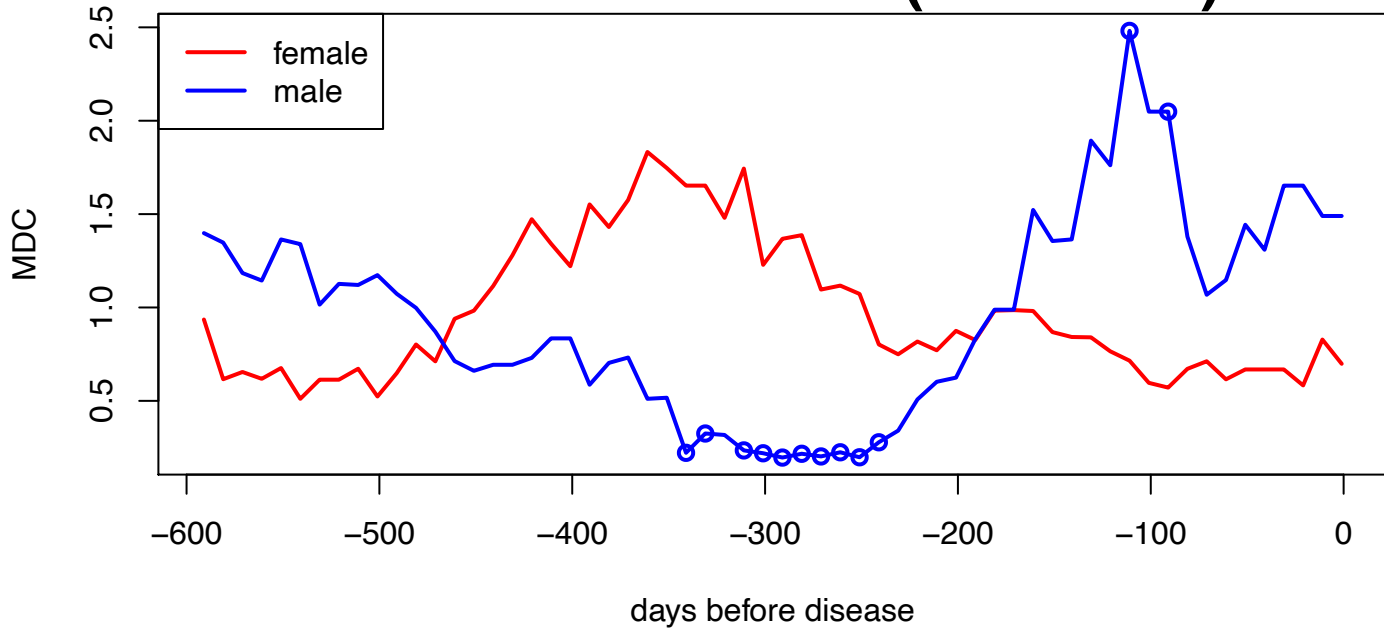

# royalblue MDC over time (cases/ctr)

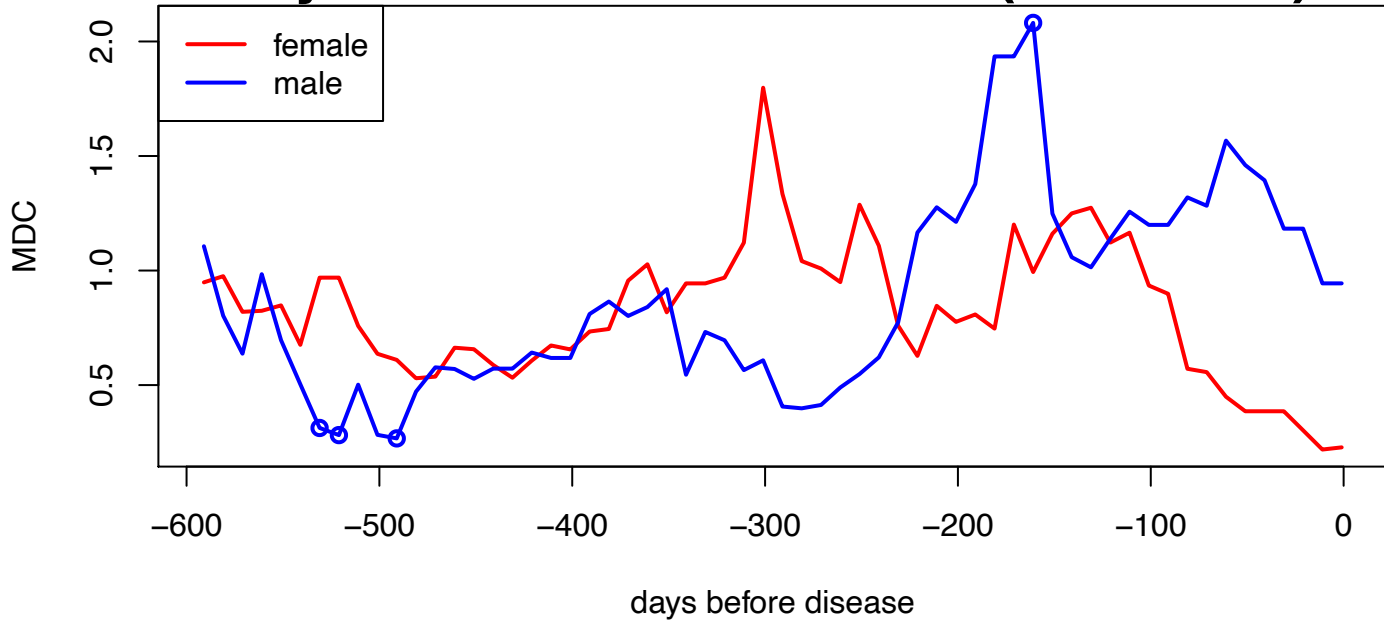

# paleturquoise MDC over time (cases/ctr)

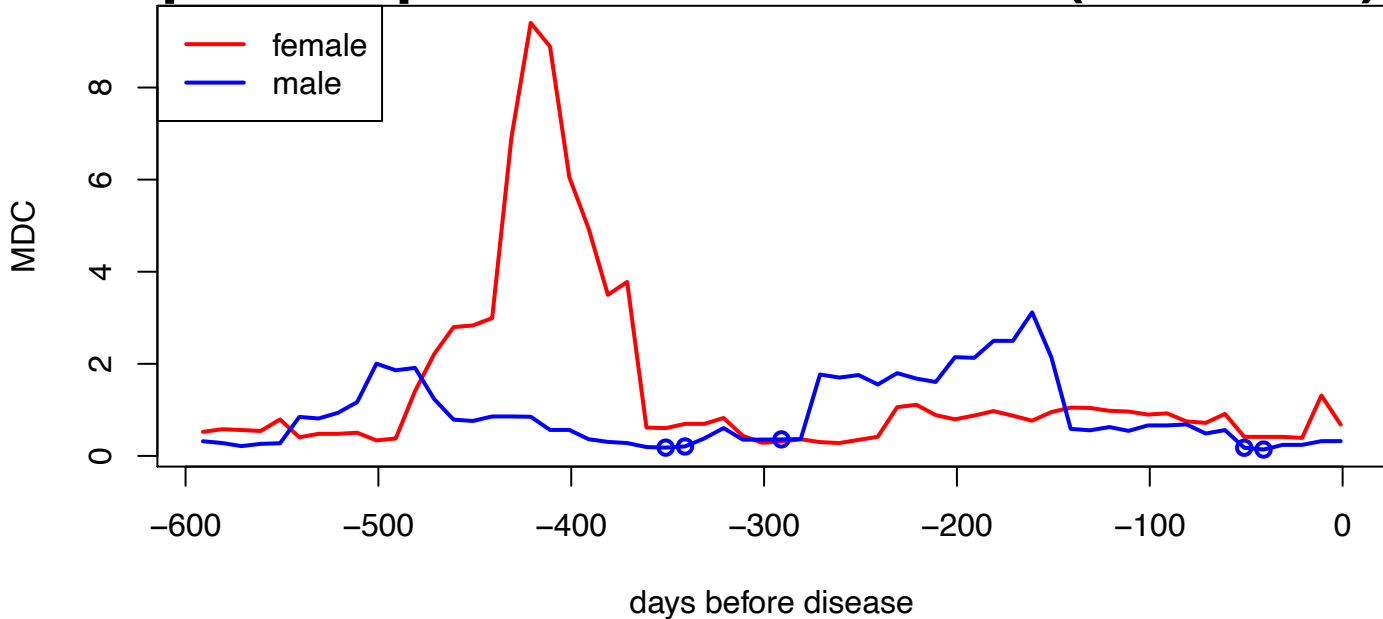

# darkorange MDC over time (cases/ctr)

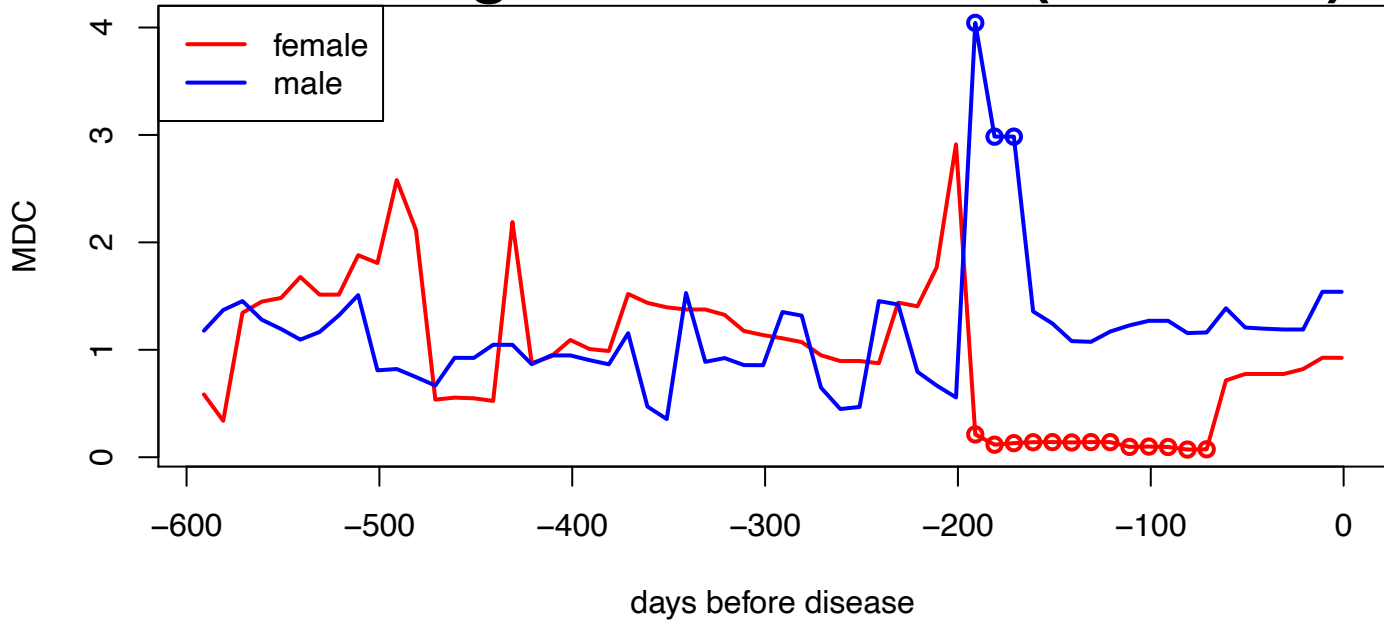

# yellowgreen MDC over time (cases/ctr)

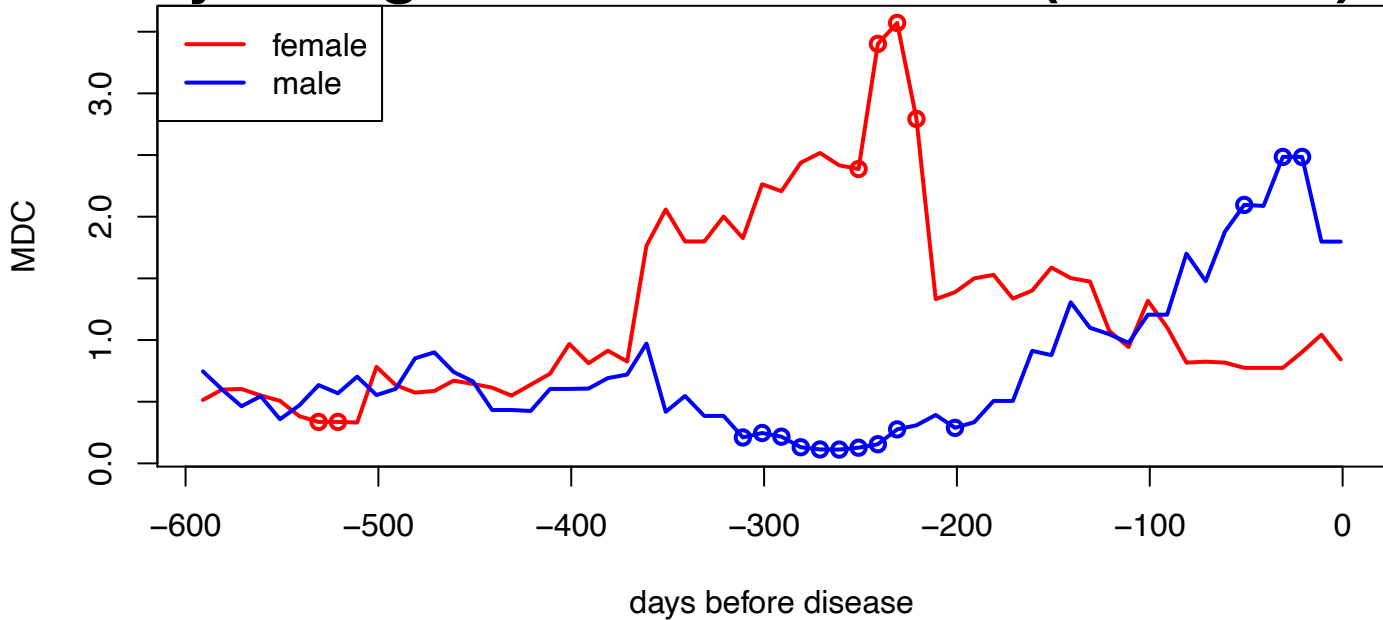

# violet MDC over time (cases/ctr)

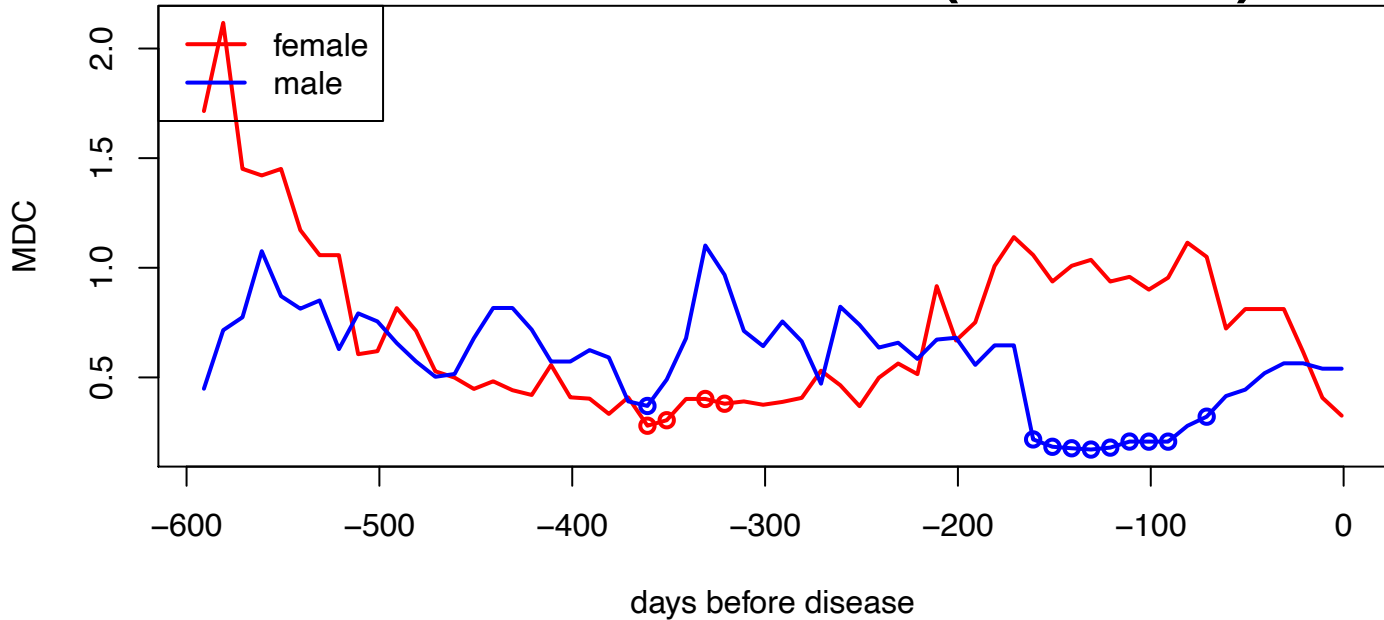

# skyblue MDC over time (cases/ctr)

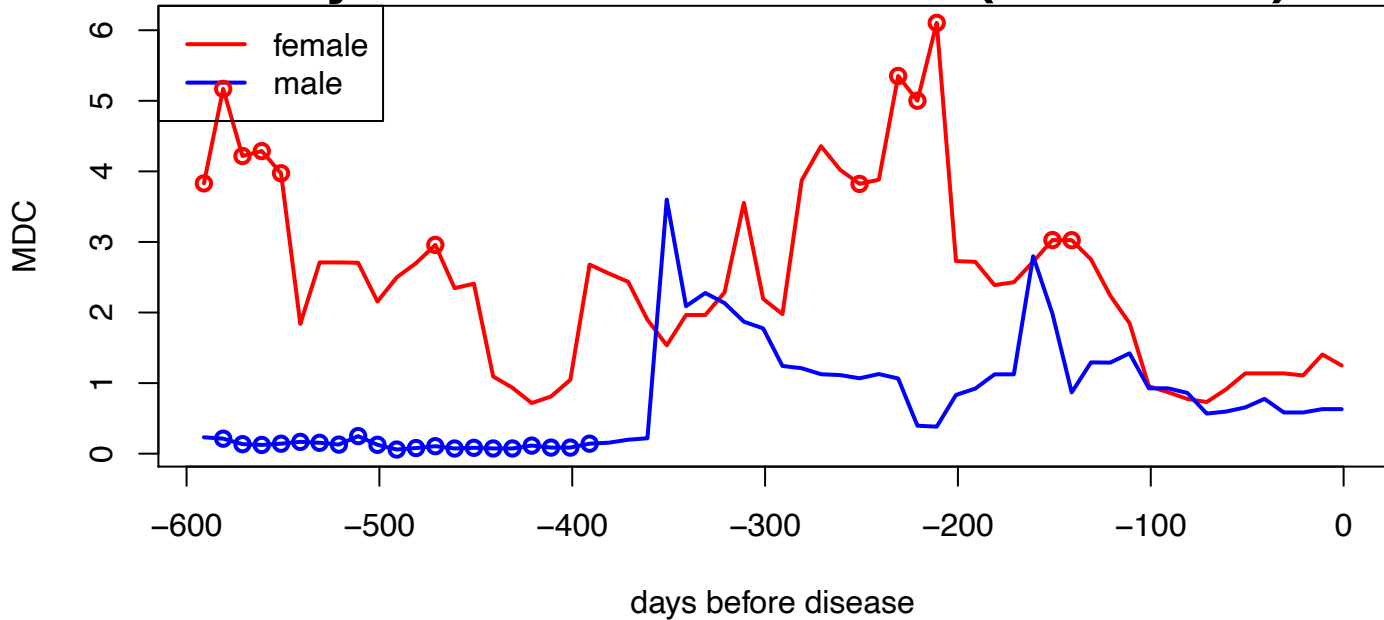

# orange MDC over time (cases/ctr)

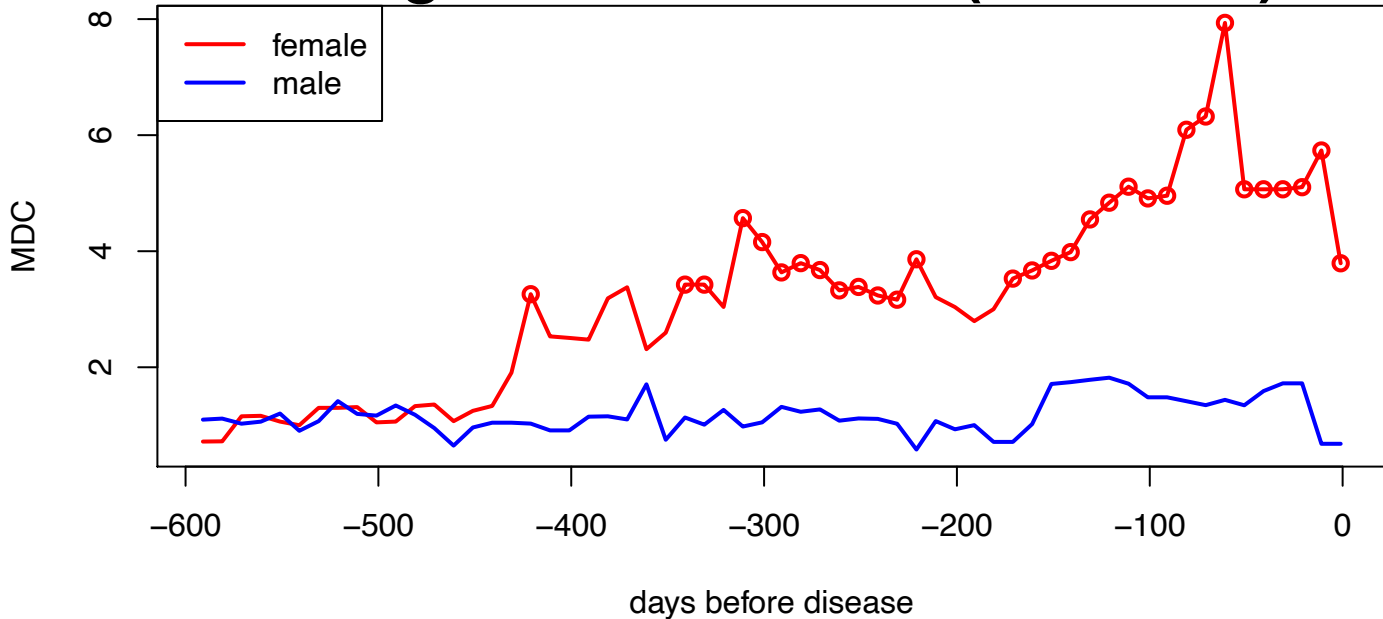



# darkmagenta MDC over time (cases/ctr)

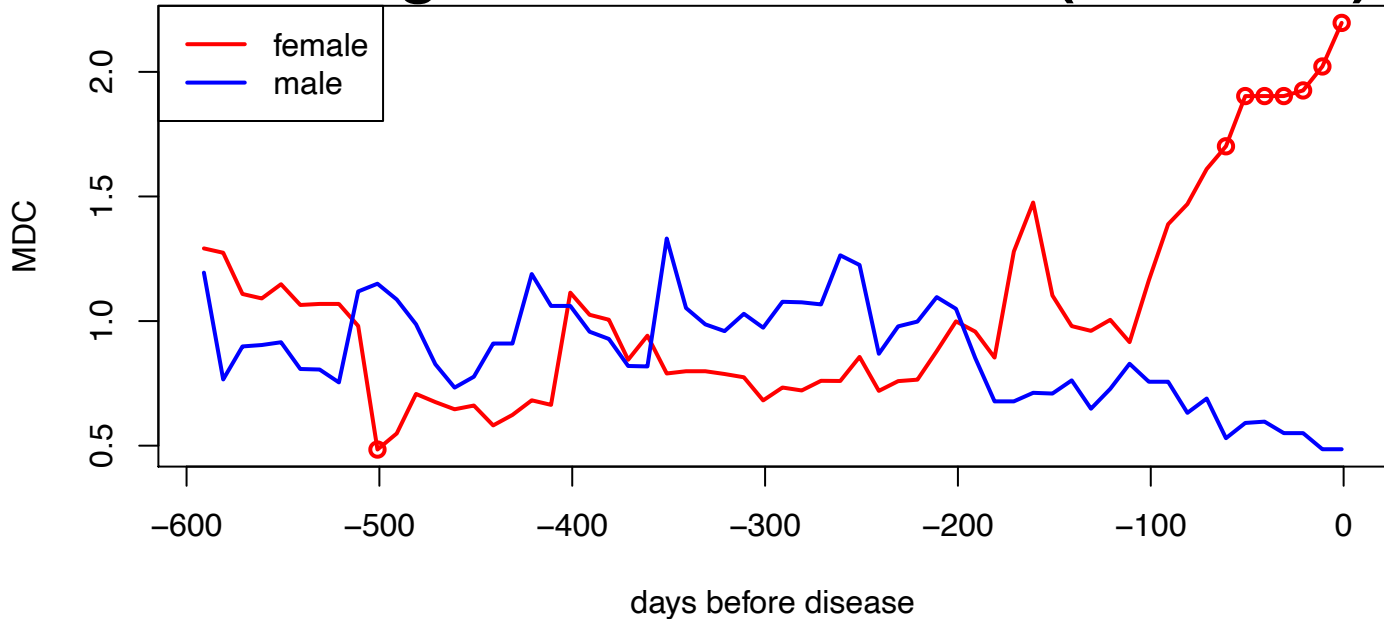

# white MDC over time (cases/ctr)

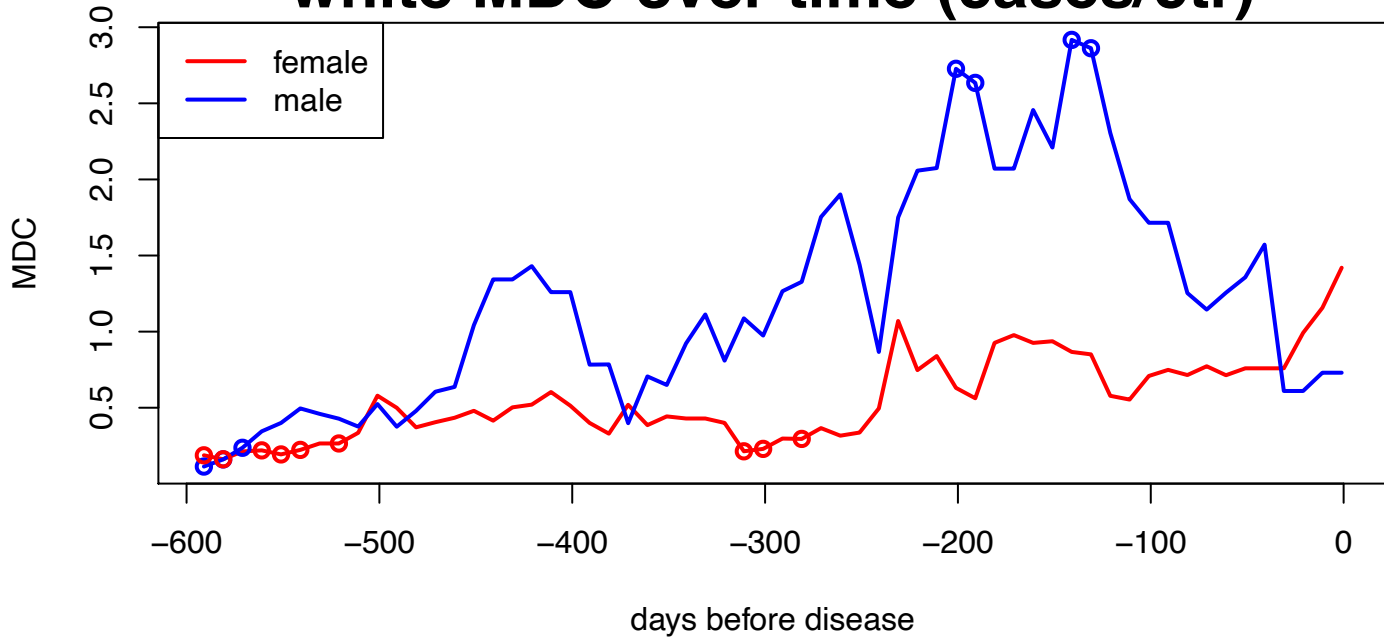

# sienna3 MDC over time (cases/ctr)

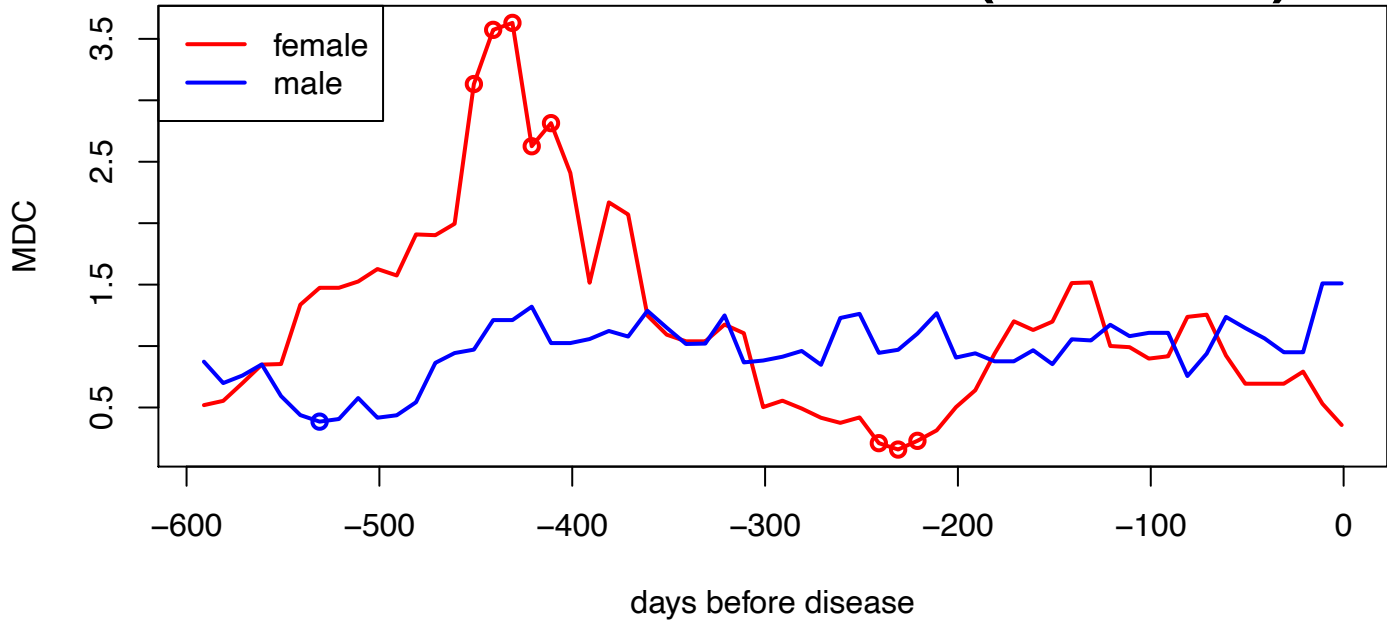

# steelblue MDC over time (cases/ctr)

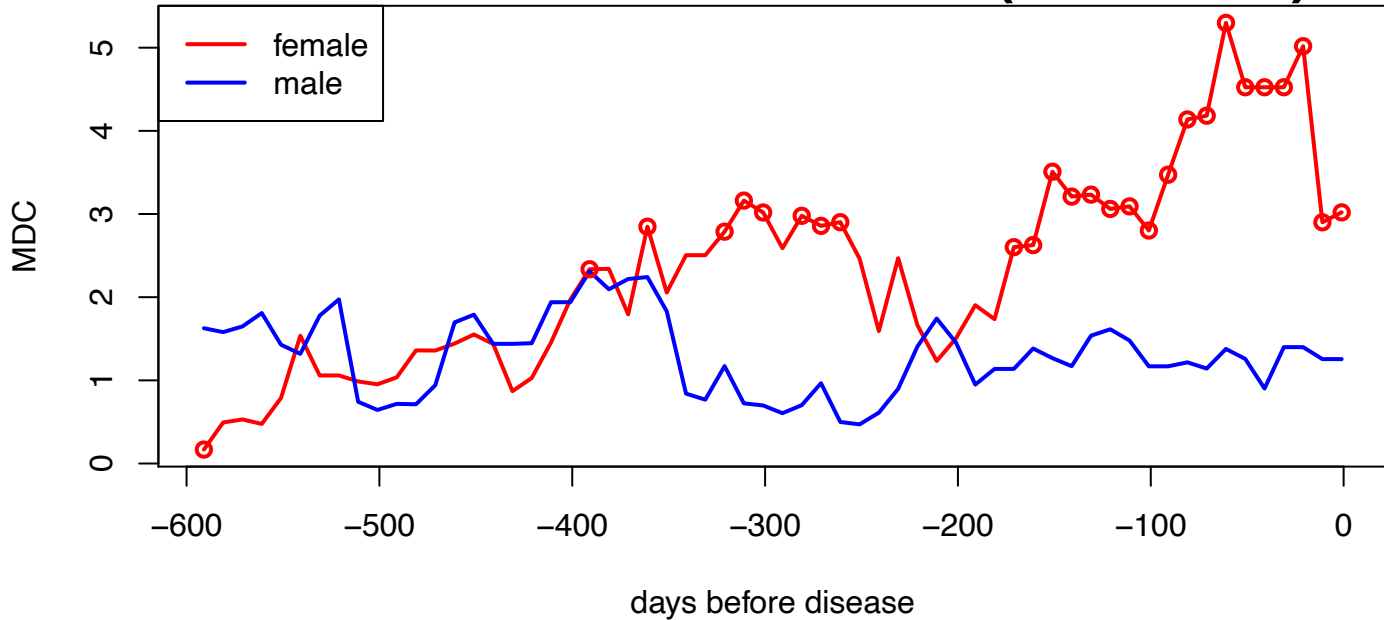

# darkolivegreen MDC over time (cases/ctr)

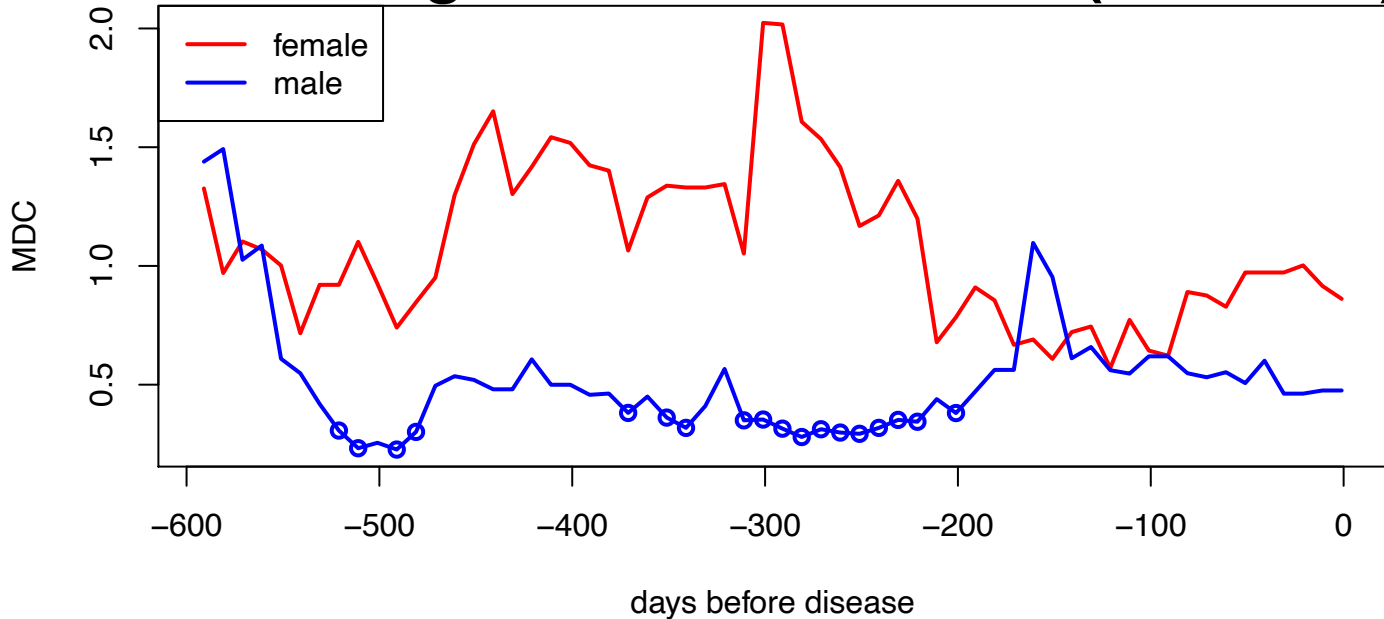

Supplement: 41598_2021_1840_MOESM1_ESM.pdf [file 41598_2021_1840_MOESM1_ESM.pdf]
